# Supplementary material
Source: Springer Nature journal article supplement (https://www.springermedizin.de/resource/supplementary/13063_2009_340_MOESM1_ESM.pdf/9618018)
Supplement: MOESM1 [file 9618018]

Titles & abstracts  
screened (n=579)

Exclusions (n=405)

*Reasons:*

Not RCT (n=308)

Short report (n=80)

Cluster RCTs (n=13)

Secondary/interim report (n=1)

Phase I or II trials (n=3)

Full articles  
screened (n=174)

Exclusions (n=41)

*Reasons:*

Not RCT (n=8)

Short report (n=4)

Cluster RCTs (n=1)

Secondary/interim report (n=14)

Phase I or II trials (n=8)

Medical education trials (n=4)

Consent not gained pre-  
randomisation (n=2)

Total included n=133
